# Supplementary material
Source: ML conference proceedings conference paper supplement (https://openreview.net/forum?id=gItvr7Xl66)
Supplement: supplementary_material [file attachment]

# Vice VRsa pre-study questionnaire

The survey will take approximately 2 minutes to complete.

\* Required

1. Participant ID \*

2. What is your age?

3. What is your gender?

- ☐ Woman
- ☐ Man
- ☐ Non-binary
- ☐ Prefer not to say
- ☐ Other

4. What is your job title or role? \*

5. How many years of experience do you have with virtual reality? \*

6. What virtual reality hardware do you have experience with? \*

7. How often do you use VR environments for professional work? \*

☐ Daily

☐ Weekly

☐ Monthly

☐ Seasonal

☐ Yearly

☐ Never

---

This content is neither created nor endorsed by Microsoft. The data you submit will be sent to the form owner.

 Microsoft Forms
