# Supplementary material
Source: ML conference proceedings conference paper supplement (https://openreview.net/forum?id=gItvr7Xl66)
Supplement: supplementary_material [file attachment]

# Vice VRsa post study questionnaire

\* Required

1

Participant ID

\*

2

[Outside VR] I  
would find this  
feature useful...

\*

## Outside VR: Public display with 2 views

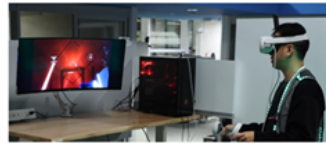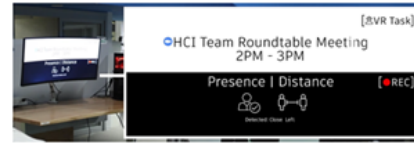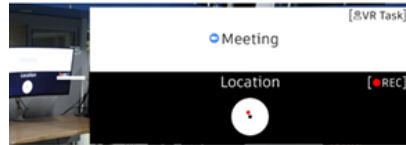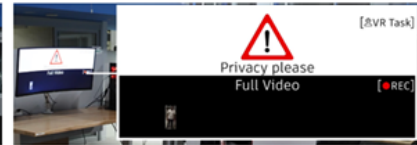

## Outside VR: Color indicator

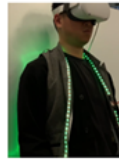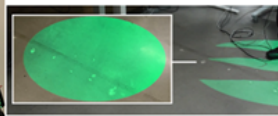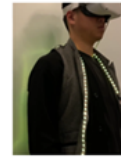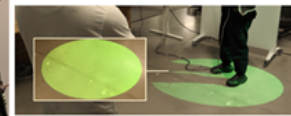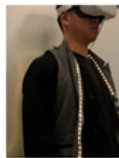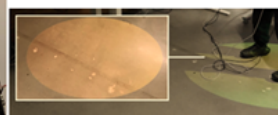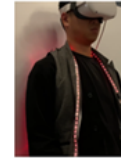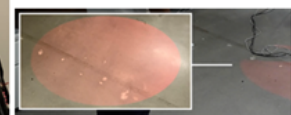

|                                                              | Strongly disagree     | Disagree              | Neutral<br>(neither agree nor disagree) | Agree                 | Strongly agree        |
|--------------------------------------------------------------|-----------------------|-----------------------|-----------------------------------------|-----------------------|-----------------------|
| Outside VR:<br>Public display showing VR user's activity     | <input type="radio"/> | <input type="radio"/> | <input type="radio"/>                   | <input type="radio"/> | <input type="radio"/> |
| Outside VR:<br>Public display showing what is being recorded | <input type="radio"/> | <input type="radio"/> | <input type="radio"/>                   | <input type="radio"/> | <input type="radio"/> |
| Outside VR:<br>Color indicators showing privacy mode         | <input type="radio"/> | <input type="radio"/> | <input type="radio"/>                   | <input type="radio"/> | <input type="radio"/> |

[Inside VR] I would find this feature useful... \*

## Inside VR: halo, radar view, live view

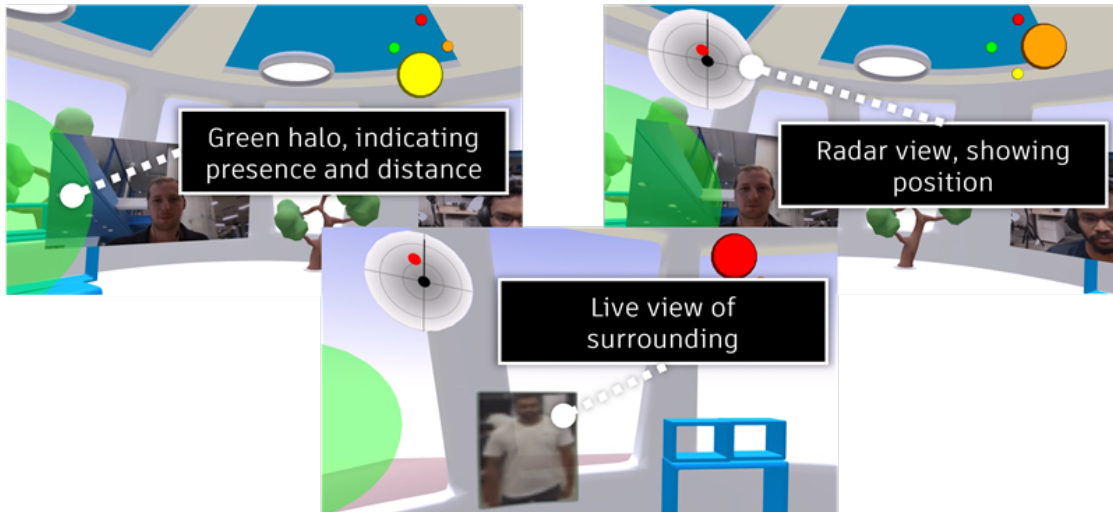

|                                                                                      | Strongly disagree     | Disagree              | Neutral<br>(neither agree nor disagree) | Agree                 | Strongly agree        |
|--------------------------------------------------------------------------------------|-----------------------|-----------------------|-----------------------------------------|-----------------------|-----------------------|
| Inside VR:<br>green halo,<br>indicating a<br>bystander's<br>presence and<br>distance | <input type="radio"/> | <input type="radio"/> | <input type="radio"/>                   | <input type="radio"/> | <input type="radio"/> |
| Inside VR:<br>radar view,<br>showing<br>position of<br>the bystander                 | <input type="radio"/> | <input type="radio"/> | <input type="radio"/>                   | <input type="radio"/> | <input type="radio"/> |
| Inside VR:<br>Showing a<br>live view of<br>any<br>bystander in                       | <input type="radio"/> | <input type="radio"/> | <input type="radio"/>                   | <input type="radio"/> | <input type="radio"/> |

bystander in  
the  
surroundings

4

Please indicate your level of agreement \*

|                                                                                                            | Strongly<br>disagree  | Disagree              | Neutral               | Agree                 | Strongly<br>agree     |
|------------------------------------------------------------------------------------------------------------|-----------------------|-----------------------|-----------------------|-----------------------|-----------------------|
| As a <b>VR user</b><br>I could<br>imagine<br>myself using<br>this system                                   | <input type="radio"/> |
| As a <b>VR user</b><br>I would find<br>this system<br>useful to be<br>aware of my<br>surrounding           | <input type="radio"/> |
| As a <b>VR user</b><br>I would find<br>this system<br>distracting.                                         | <input type="radio"/> |
| As a <b>VR user</b><br>I would find<br>this system<br>useful                                               | <input type="radio"/> |
| As a<br><b>bystander</b> I<br>would find<br>this system to<br>be useful.                                   | <input type="radio"/> |
| As a<br><b>bystander</b> I<br>would<br>regulate my<br>behaviour<br>depending<br>on the VR<br>user's<br>... | <input type="radio"/> |

settings.

As a  
**bystander** I  
would find  
this system to  
be  
distracting.

☐

☐

☐

☐

☐

As a  
**bystander**  
this system  
would  
intrigue me

☐

☐

☐

☐

☐

This content is neither created nor endorsed by Microsoft. The data you submit will be sent to the form owner.
